# Supplementary material
Source: PubMed Central journal article supplement (PMC3176349)
Supplement: Supp_Data.pdf [file Supp_Data.pdf]

## Supplementary Data

### Materials and Methods

#### *Genotyping of transgenic mice with cardiac-specific overexpression of Akt*

Production of MyAkt mice was described in detail previously (1). Cardiac-specific Akt transgenic mice (TG564 line) were genotyped by polymerase chain reaction using the following primer pair: forward; 5'-AGCCTAGCCCACACCAG AAA; reverse; 5'-GCCAGCCCTCCTCACAAT (Supple-

mentary Fig. S1). Transgenic positive mice and their transgenic negative littermates (wild-type) were used for experiments.

### Reference

1. Matsui T, Li L, Wu JC, Cook SA, Nagoshi T, Picard MH, *et al.* Phenotypic spectrum caused by transgenic overexpression of activated Akt in the heart. *J Biol Chem* 277, 22896–22901, 2002.

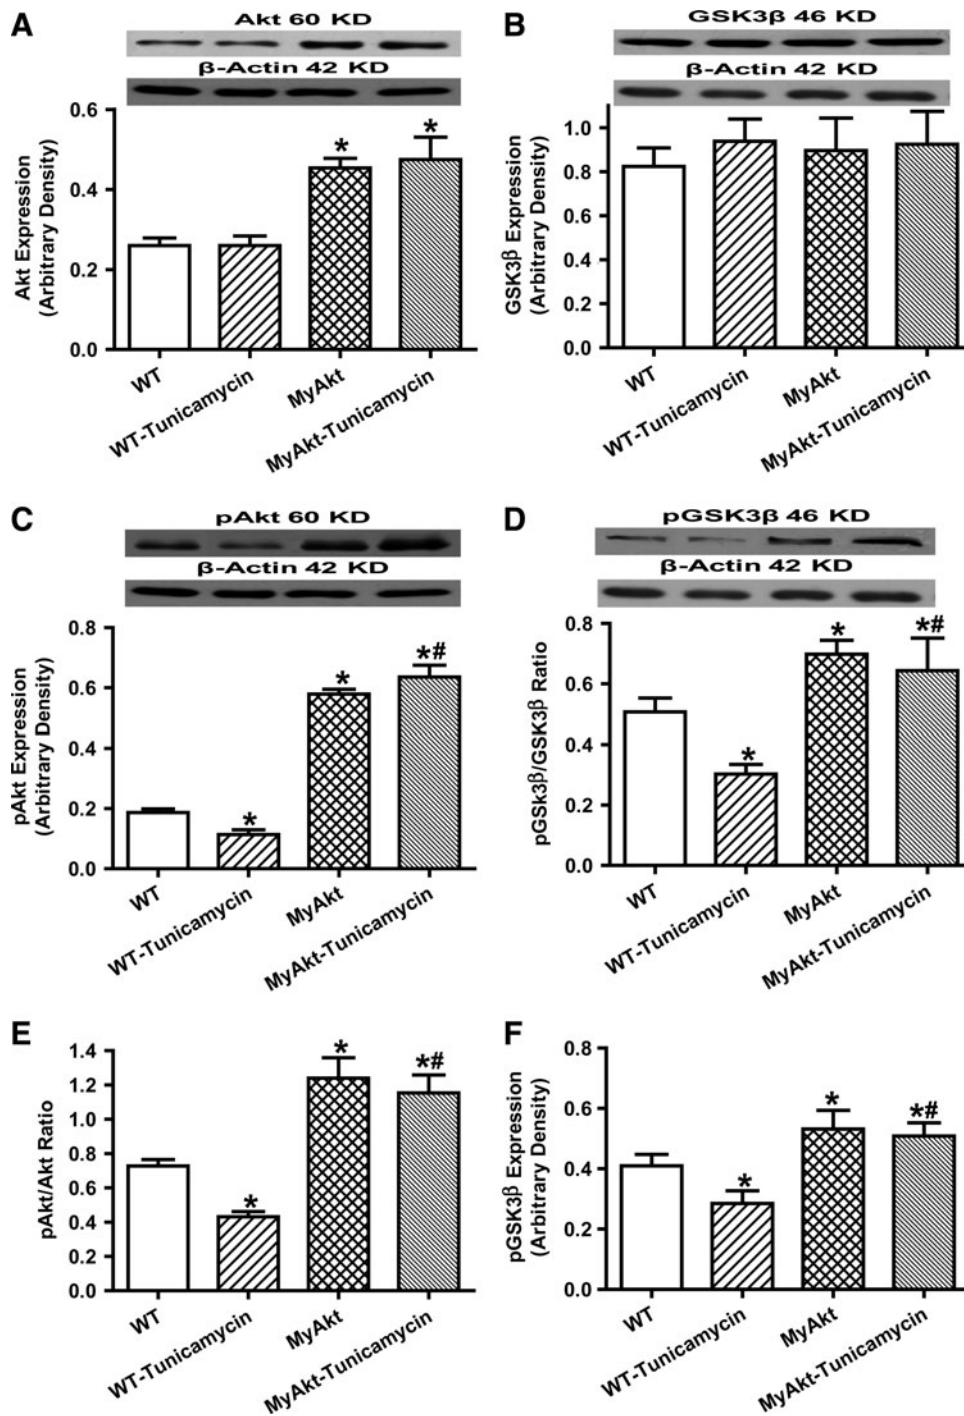

**SUPPLEMENTARY FIG. S1.** Effect of tunicamycin on the expression of pan and phosphorylated Akt and glycogen synthase kinase 3 $\beta$  (GSK3 $\beta$ ) in isolated cardiomyocytes from wild-type (WT) and MyAkt mice. Isolated murine cardiomyocytes were incubated with tunicamycin (3  $\mu$ g/ml) for 5–6 h *in vitro* before assessment of protein abundance. (A) Pan Akt; (B) Pan GSK3 $\beta$ ; (C) phosphorylated Akt (pAkt); (D) phosphorylated GSK3 $\beta$ ; (E) pAkt-to-Akt ratio; and (F) pGSK3 $\beta$ -to-GSK3 $\beta$  ratio. *Insets:* Representative gel blots depicting expression of pan and phosphorylated Akt and GSK3 $\beta$  using specific antibodies. All protein expression was normalized to that of the loading control  $\beta$ -actin. Mean  $\pm$  SEM,  $n = 5$ –7 isolations per group, \* $p < 0.05$  versus WT group; \*\* $p < 0.05$  versus respective WT-tunicamycin group.

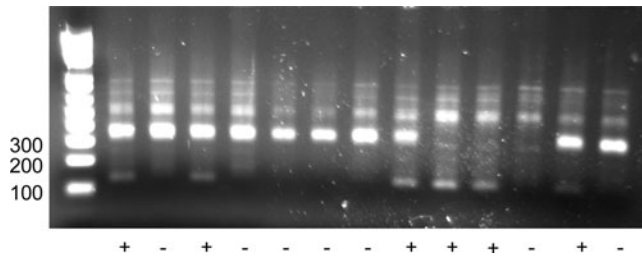

**SUPPLEMENTARY FIG. S2. Polymerase chain reaction identification of MyAkt transgenic mice.** Genomic DNA prepared from tails was employed as a template for polymerase chain reaction using primers to detect amplicon, respectively. The positive band is the one between 100 and 200 bp. The primers are forward, 5'-AGCCTAGCCCA CACCAGAAA; and reverse, 5'-GCCAGCCCTCCTCA CAAT.
